# Supplementary material
Source: Royal Society of Chemistry journal article supplement (doi:10.1039/d6ta02290a)
Supplement: d6ta02290a2.pdf [file d6ta02290a2.pdf]

## Supplementary Material

### Flexible zinc-ion hybrid supercapacitors with high energy density and long cycling life enabled by microfluidic assembly of MXene composite fibers

Menghan Chu, Fanyu Xie, Jinlei Cao, Hui Cao, Hongwei Li, Mei Zhang\*

Beijing Key Laboratory of Clothing Materials R & D and Assessment, Beijing Engineering Research Center of Textile Nanofiber, School of Materials Design and Engineering, Beijing Institute of Fashion Technology, Beijing, 100029, China.

Corresponding Author, E-mail: [20140027@bift.edu.cn](mailto:20140027@bift.edu.cn) (M. Zhang).

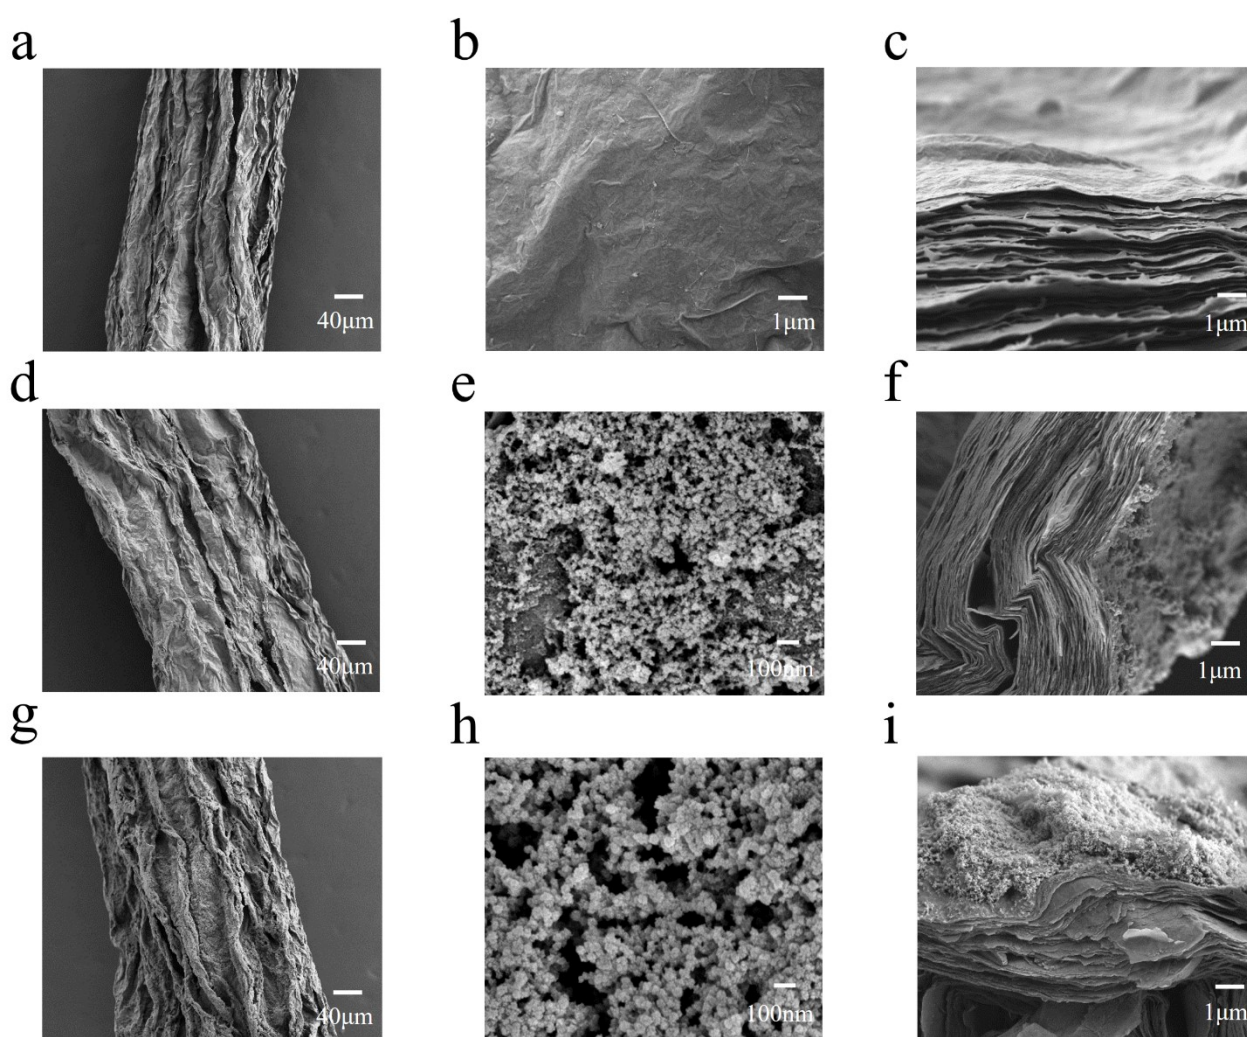

**Fig. S1** (a-c) Surface and cross-sectional scanning electron micrographs of MXene fibers; (d-f) Surface and cross-sectional scanning electron micrographs of MXene/MnO<sub>2</sub>-1 fibers; (g-i) Surface and cross-sectional scanning electron micrographs of MXene/MnO<sub>2</sub>-3 fibers.

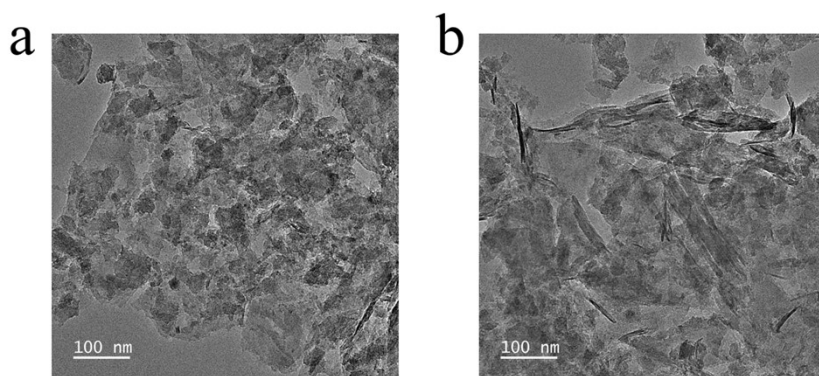

**Fig. S2** TEM image of MXene/MnO<sub>2</sub>-2 composite fibers

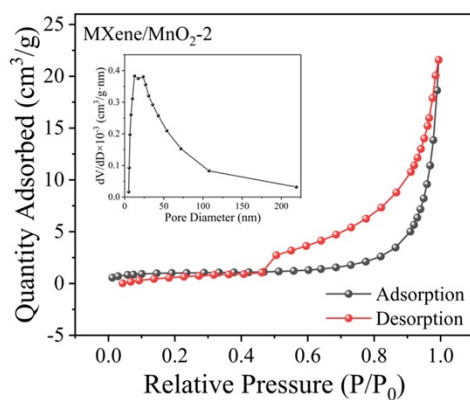

**Fig. S3** N<sub>2</sub> adsorption-desorption isotherms and pore size distribution curves of MXene/MnO<sub>2</sub>-2 composite fibers

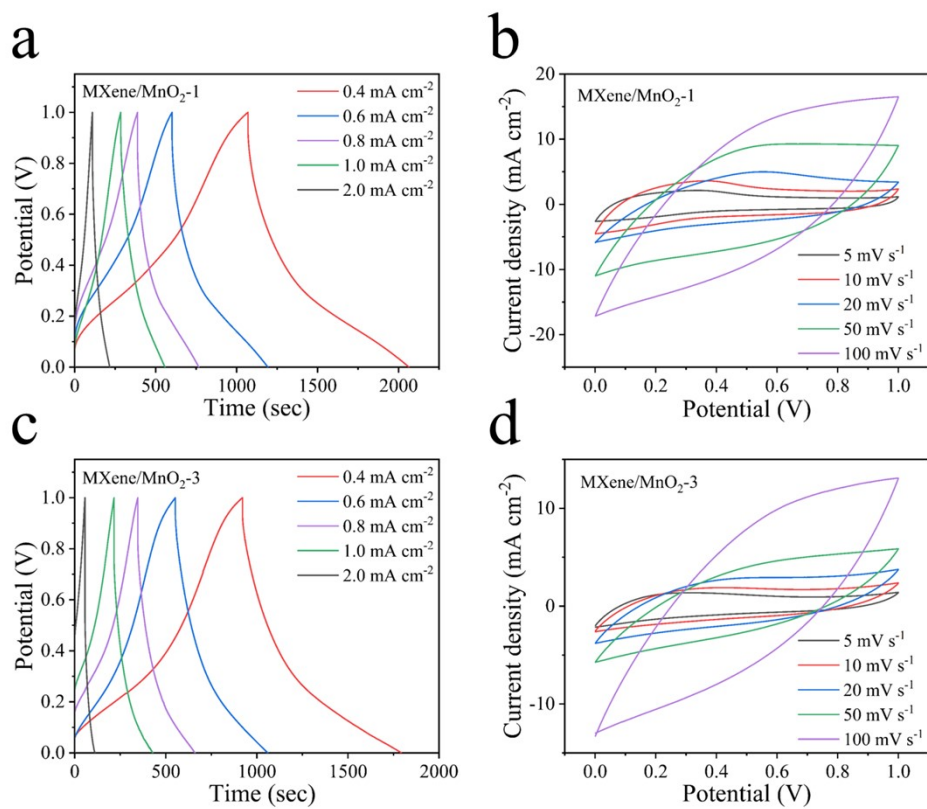

**Fig. S4** Flexible symmetric supercapacitors assembled from MXene/MnO<sub>2</sub>-1 and MXene/MnO<sub>2</sub>-3 fibers under a 0-1 V voltage window in PVA/H<sub>2</sub>SO<sub>4</sub> electrolyte: (a, c) Comparison of GCD curves at current densities of 0.4-2.0 mA cm<sup>-2</sup>, (b, d) Comparison of CV curves at scan rates of 5-100 mV s<sup>-1</sup>.

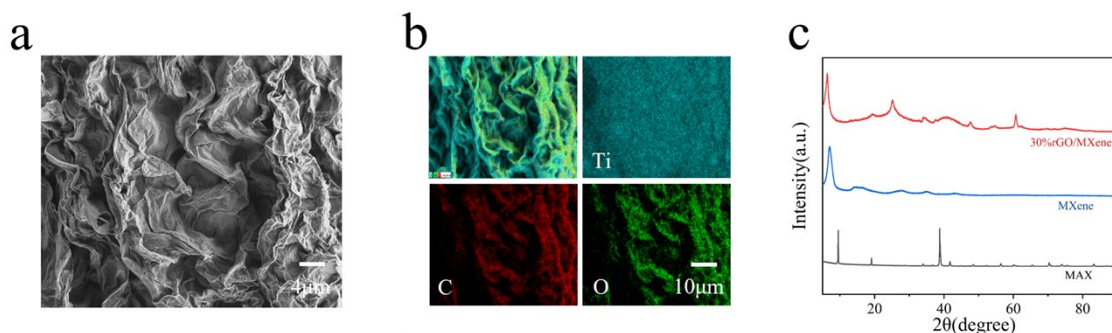

**Fig. S5** (a) SEM image of 30% rGO/MXene fibers; (b) EDX elemental mapping of 30% rGO/MXene fibers; (c) XRD patterns of MAX, MXene and 30% rGO/MXene.

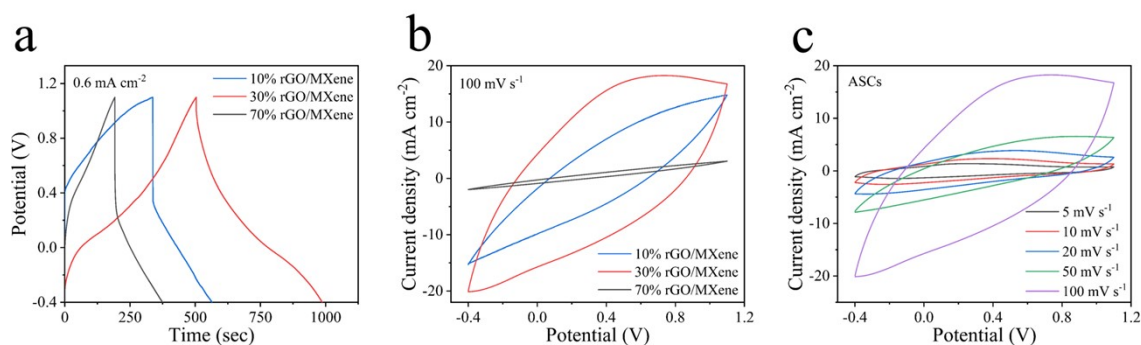

**Fig. S6** Flexible ASCs assembled by MXene/MnO<sub>2</sub> composite fibers and rGO/MXene composite fibers with various rGO contents under voltage window of -0.4-1.1 V in PVA/H<sub>2</sub>SO<sub>4</sub> gel electrolyte: (a) Comparison of GCD curves at a current density of 0.6 mA cm<sup>-2</sup>, (b) Comparison of CV curves at a scan rate of 100 mV s<sup>-1</sup>, (c) CV curves at scan rates of 5-100 mV s<sup>-1</sup> for flexible ASCs assembled by MXene/MnO<sub>2</sub>//30% rGO/MXene composite fibers.

**Table S1** Comparison of specific areal capacitance with other zinc-ion hybrid supercapacitors

| Electrode materials                                                                            | Electrolyte                                                      | Specific capacitance<br>(mF cm <sup>-2</sup> ) | Voltage<br>windows (V) | Ref.         |
|------------------------------------------------------------------------------------------------|------------------------------------------------------------------|------------------------------------------------|------------------------|--------------|
| V <sub>2</sub> CT <sub>x</sub> /CNT//Zn                                                        | PAM/ZnSO <sub>4</sub>                                            | 246.88 (0.5 mA cm <sup>-2</sup> )              | -0.2-1.9V              | [1]          |
| 10% rGO/MXene//<br>70% rGO/MXene@Zn                                                            | PVA/Zn(CF <sub>3</sub> SO <sub>3</sub> ) <sub>2</sub>            | 1180 (0.4 mA cm <sup>-2</sup> )                | 0-1.6V                 | [2]          |
| V <sub>2</sub> O <sub>5</sub> //MXene                                                          | PAM/ZnSO <sub>4</sub>                                            | 129 (0.34 mA cm <sup>-2</sup> )                | 0-1.65V                | [3]          |
| CNT//CNT@Zn                                                                                    | ZnSO <sub>4</sub>                                                | 83.2 (1 mA cm <sup>-2</sup> )                  | 0.2-1.8V               | [4]          |
| N-CNF//Zn                                                                                      | ZnCl <sub>2</sub>                                                | 700.7 (1 mV s <sup>-1</sup> )                  | 0.2-1.8V               | [5]          |
| AC@CF//2D-Zn@CF                                                                                | PVA/ZnSO <sub>4</sub>                                            | 56 (0.05 mA cm <sup>-2</sup> )                 | 0.2-1.8V               | [6]          |
| α-MnO <sub>2</sub> @rGO//<br>AC@CC                                                             | CMC/PVA-EG<br>/Zn(CF <sub>3</sub> SO <sub>3</sub> ) <sub>2</sub> | 575.5 (6 mA cm <sup>-2</sup> )                 | 0-2V                   | [7]          |
| Ti <sub>3</sub> C <sub>2</sub> T <sub>x</sub> MXene//Zn                                        | Gelatin/ZnSO <sub>4</sub>                                        | 214 (5 mV s <sup>-1</sup> )                    | 0-1.2V                 | [8]          |
| CNT//Zn                                                                                        | PAM/ZnSO <sub>4</sub>                                            | 73 (0.34 mA cm <sup>-2</sup> )                 | 0-1.8V                 | [9]          |
| T-Nb <sub>2</sub> O <sub>5</sub> /rGO@CC//<br>ACcp@CC                                          | ZnSO <sub>4</sub>                                                | 718.56 (1 mA cm <sup>-2</sup> )                | 0-2V                   | [10]         |
| Al <sub>x</sub> V <sub>2</sub> O <sub>5</sub> -NMP//<br>m-Ti <sub>3</sub> C <sub>2</sub> MXene | PVA/Zn(CF <sub>3</sub> SO <sub>3</sub> ) <sub>2</sub>            | 233.66 (0.5 mA cm <sup>-2</sup> )              | 0-1.8V                 | [11]         |
| MXene/MnO <sub>2</sub> //<br>30%rGO/MXene                                                      | ZnSO <sub>4</sub>                                                | 1356 (0.6 mA cm <sup>-2</sup> )                | -0.1-1.5V              | This<br>work |

## References

- 1 D. Wu, S. Zhao, T. Huang, W. He, X. Zhou, G. Wang, M. Guo, X. Luo, M. Cao, Y. Yue, W. Lai, C. Zhang and Y. Ma, *Chem. Eng. J.*, 2024, **490**, 151589.
- 2 F. Xie, Y. Du, M. Chu, X. Jia, H. Cao, R. Zhang, H. Li and M. Zhang, *Chem. Eng. J.*, 2025, **513**, 162864.
- 3 X. Li, Y. Ma, Y. Yue, G. Li, C. Zhang, M. Cao, Y. Xiong, J. Zou, Y. Zhou and Y. Gao, *Chem. Eng. J.*, 2022, **428**, 130965.
- 4 G. Sun, H. Yang, G. Zhang, J. Gao, X. Jin, Y. Zhao, L. Jiang and L. Qu, *Energy Environ. Sci.*, 2018, **11**, 3367–3374.

- 5 A. Amiri, M. Naraghi and A. A. Polycarpou, *J. Energy Chem.*, 2022, **70**, 480–491.
- 6 G. An, J. Hong, S. Pak, Y. Cho, S. Lee, B. Hou and S. Cha, *Adv. Energy Mater.*, DOI:10.1002/aenm.201902981.
- 7 Y. Bai, K. Li, L. Wang, Y. Gao, X. Li, X. Yang and W. Lü, *J. Power Sources*, 2024, **591**, 233878.
- 8 B. Shi, L. Li, A. Chen, T.-C. Jen, X. Liu and G. Shen, *Nano-Micro Lett.*, DOI:10.1007/s40820-021-00757-6.
- 9 X. Li, X. Zhou, G. Li, Z. Wang, C. Zhang, Y. Wu and B. Zhu, *Electrochimica Acta*, 2025, **525**, 146074.
- 10 Z. Hao, Z. Zhang, X. Yang, X. Li, Y. Gao, L. Wang, Y. Huang and W. Lü, *J. Alloys Compd.*, 2025, **1037**, 182324.
- 11 W. Liu, J. Zhang, J. Li, Z. Ma, L. Sun, Y. Feng and L. Zhang, *Energy*, 2025, **334**, 137648.
